# Supplementary material
Source: publisher figshare collection journal article supplement (https://sage.figshare.com/ndownloader/files/18613874)
Supplement: Supplementary file 1 [file 18613874]

## Appendix

| Variable                                                       | Participants |       | Non-Participants |       |
|----------------------------------------------------------------|--------------|-------|------------------|-------|
|                                                                | N            | Mean  | N                | Mean  |
| <b>Sociodemographics</b>                                       |              |       |                  |       |
| Employment probability 180 days after programme start          | 63878        | 0.10  | 103641           | 0.11  |
| Daily wage 180 days after programme start (if employed)        | 2332         | 38.23 | 4817             | 36.94 |
| Gender: female                                                 | 63878        | 0.45  | 103641           | 0.46  |
| No graduate                                                    | 63877        | 0.10  | 103617           | 0.14  |
| Intermediate school certificate, no professional qualification | 63877        | 0.24  | 103617           | 0.29  |
| High school degree or vocational training                      | 63877        | 0.58  | 103617           | 0.47  |
| High school degree and vocational training                     | 63877        | 0.04  | 103617           | 0.05  |
| Subject-linked university degree                               | 63877        | 0.02  | 103617           | 0.02  |
| University degree                                              | 63877        | 0.02  | 103617           | 0.03  |
| Age group < 25 years                                           | 63878        | 0.04  | 103641           | 0.14  |
| Age group 25 until 30 years                                    | 63878        | 0.13  | 103641           | 0.14  |
| Age group 30 until 35 years                                    | 63878        | 0.13  | 103641           | 0.13  |
| Age group 35 until 40 years                                    | 63878        | 0.14  | 103641           | 0.11  |
| Age group 40 until 45 years                                    | 63878        | 0.18  | 103641           | 0.12  |
| Age group 45 until 50 years                                    | 63878        | 0.20  | 103641           | 0.13  |
| Age group 50 until 58 years                                    | 63878        | 0.15  | 103641           | 0.18  |
| Age group > 58 years                                           | 63878        | 0.03  | 103641           | 0.05  |
| Family Status: living alone                                    | 63878        | 0.45  | 103641           | 0.45  |
| Family Status: married/living with a partner                   | 63878        | 0.33  | 103641           | 0.34  |
| Family Status: divorced/widowed/living separately              | 63878        | 0.23  | 103641           | 0.21  |
| Family Status: missing                                         | 63878        | 0.00  | 103641           | 0.00  |
| Citizenship: German                                            | 63878        | 0.90  | 103641           | 0.81  |
| Citizenship: other than German                                 | 63878        | 0.10  | 103641           | 0.19  |
| Citizenship: missing                                           | 63878        | 0.00  | 103641           | 0.00  |
| Health problems: yes                                           | 63870        | 0.25  | 103520           | 0.22  |
| <b>Household information</b>                                   |              |       |                  |       |
| Child < 3 years: no                                            | 63878        | 0.58  | 103641           | 0.50  |
| Child < 3 years: yes                                           | 63878        | 0.03  | 103641           | 0.04  |
| Child < 3 years: missing                                       | 63878        | 0.39  | 103641           | 0.46  |
| Child between 3 and 6 years: no                                | 63878        | 0.58  | 103641           | 0.50  |
| Child between 3 and 6 years: yes                               | 63878        | 0.04  | 103641           | 0.04  |
| Child between 3 and 6 years: missing                           | 63878        | 0.39  | 103641           | 0.46  |
| Child between 6 and 10 years: no                               | 63878        | 0.54  | 103641           | 0.47  |
| Child between 6 and 10 years: yes                              | 63878        | 0.08  | 103641           | 0.07  |
| Child between 6 and 10 years: missing                          | 63878        | 0.39  | 103641           | 0.46  |
| Child between 10 and 15 years: no                              | 63878        | 0.52  | 103641           | 0.46  |
| Child between 10 and 15 years: yes                             | 63878        | 0.09  | 103641           | 0.08  |
| Child between 10 and 15 years: missing                         | 63878        | 0.39  | 103641           | 0.46  |
| Role within household: Main person                             | 63878        | 0.86  | 103641           | 0.79  |

|                                                                                |       |      |        |      |
|--------------------------------------------------------------------------------|-------|------|--------|------|
| Role of within household: partner                                              | 63878 | 0.13 | 103641 | 0.15 |
| Role of within household: minor, unmarried child / unmarried adult             | 63878 | 0.01 | 103641 | 0.06 |
| Role of within household: missing                                              | 63878 | 0.00 | 103641 | 0.00 |
| Number of persons in BG: 1                                                     | 63878 | 0.48 | 103641 | 0.46 |
| Number of persons in BG: 2                                                     | 63878 | 0.23 | 103641 | 0.23 |
| Number of persons in BG: 3                                                     | 63878 | 0.14 | 103641 | 0.15 |
| Number of persons in BG: 4                                                     | 63878 | 0.09 | 103641 | 0.10 |
| Number of persons in BG: 5 or more                                             | 63878 | 0.06 | 103641 | 0.07 |
| Number of persons in BG: missing                                               | 63878 | 0.00 | 103641 | 0.00 |
| Number of persons of age able to work: 1                                       | 63878 | 0.62 | 103641 | 0.58 |
| Number of persons of age able to work: 2                                       | 63878 | 0.31 | 103641 | 0.34 |
| Number of persons of age able to work: > 2                                     | 63878 | 0.06 | 103641 | 0.08 |
| Number of persons of age able to work: missing                                 | 63878 | 0.00 | 103641 | 0.00 |
| Number of persons under age able to work: 0                                    | 63878 | 0.91 | 103641 | 0.91 |
| Number of persons under age able to work: 1                                    | 63878 | 0.08 | 103641 | 0.08 |
| Number of persons under age able to work: more than 1                          | 63878 | 0.01 | 103641 | 0.01 |
| Number of persons under age able to work: missing                              | 63878 | 0.00 | 103641 | 0.00 |
| Number of unemployed persons: 0                                                | 63878 | 0.98 | 103641 | 0.97 |
| Number of unemployed persons: 1                                                | 63878 | 0.02 | 103641 | 0.03 |
| Number of unemployed persons: > 1                                              | 63878 | 0.00 | 103641 | 0.00 |
| Number of persons above age limit: 0                                           | 63878 | 1.00 | 103641 | 0.99 |
| Number of persons above age limit: 1 or more                                   | 63878 | 0.00 | 103641 | 0.01 |
| Number of persons above age limit: missing                                     | 63878 | 0.00 | 103641 | 0.00 |
| Lone parent: no                                                                | 63878 | 0.83 | 103641 | 0.86 |
| Lone parent: yes                                                               | 63878 | 0.17 | 103641 | 0.14 |
| <b>Additional administrative information</b>                                   |       |      |        |      |
| Profile: Integrated                                                            | 63878 | 0.07 | 103641 | 0.07 |
| Profile: Market, activation, promotion                                         | 63878 | 0.16 | 103641 | 0.22 |
| Profile: About to develop                                                      | 63878 | 0.35 | 103641 | 0.26 |
| Profile: About to be stable                                                    | 63878 | 0.18 | 103641 | 0.14 |
| Profile: Support necessary                                                     | 63878 | 0.15 | 103641 | 0.15 |
| Profile: missing                                                               | 63878 | 0.09 | 103641 | 0.14 |
| Job returner: no                                                               | 63878 | 0.95 | 103641 | 0.96 |
| Job returner: yes                                                              | 63878 | 0.05 | 103641 | 0.03 |
| Job returner: missing                                                          | 63878 | 0.00 | 103641 | 0.01 |
| Responsible administrative body: ARGE                                          | 63574 | 0.93 | 103423 | 0.93 |
| Responsible administrative body: gT/gAw                                        | 63574 | 0.07 | 103423 | 0.07 |
| Responsible administrative body: zkT                                           | 63574 | 0.00 | 103423 | 0.00 |
| Reason for end of receiving social assistance benefits: start of work          | 63878 | 0.07 | 103641 | 0.07 |
| Reason for end of receiving social assistance benefits: relocation             | 63878 | 0.11 | 103641 | 0.13 |
| Reason for end of receiving social assistance benefits: omission of employment | 63878 | 0.13 | 103641 | 0.12 |
| Reason for end of receiving social assistance benefits: other reasons          | 63878 | 0.16 | 103641 | 0.18 |
| Reason for end of receiving social assistance benefits: missing                | 63878 | 0.53 | 103641 | 0.50 |

|                                                          |       |          |        |          |
|----------------------------------------------------------|-------|----------|--------|----------|
| Special status                                           | 63878 | 0.15     | 103641 | 0.25     |
| Relieved receiving of benefit: children                  | 63878 | 0.02     | 103641 | 0.02     |
| Relieved receiving of benefit: job returner              | 63878 | 0.05     | 103641 | 0.02     |
| Relieved receiving of benefit: none                      | 63878 | 0.85     | 103641 | 0.75     |
| Relieved receiving of benefit: missing                   | 63878 | 0.09     | 103641 | 0.21     |
| Dropout of measure due to inappropriate behaviour        | 63878 | 0.03     | 103641 | 0.02     |
| Dropout of measure due to other reasons                  | 63878 | 0.04     | 103641 | 0.03     |
| Measure not completed successfully                       | 63878 | 0.05     | 103641 | 0.03     |
| <b>Employment History</b>                                |       |          |        |          |
| <i>Information on last job</i>                           |       |          |        |          |
| Blue-collar worker                                       | 63878 | 0.11     | 103641 | 0.12     |
| White-collar Worker                                      | 63878 | 0.03     | 103641 | 0.03     |
| profession: missing                                      | 63878 | 0.86     | 103641 | 0.85     |
| Semi-skilled worker                                      | 63878 | 0.14     | 103641 | 0.16     |
| Professionally oriented activities                       | 63878 | 0.69     | 103641 | 0.64     |
| Complex specialized activities                           | 63878 | 0.07     | 103641 | 0.07     |
| Highly complex activities                                | 63878 | 0.08     | 103641 | 0.08     |
| Complexity: missing                                      | 63878 | 0.02     | 103641 | 0.05     |
| Manufacturing/ processing trade / agriculture            | 63878 | 0.41     | 103641 | 0.36     |
| Service sector or others                                 | 63878 | 0.59     | 103641 | 0.64     |
| <i>Indicators of past employment history</i>             |       |          |        |          |
| Number of months employed: 1 years before 2010           | 63878 | 0.36     | 103641 | 0.62     |
| Number of months employed: 2-4 years before 2010         | 63878 | 2.53     | 103641 | 3.55     |
| Number of months employed: 5-7 years before 2010         | 63878 | 4.13     | 103641 | 4.70     |
| Number of months unemployed: 1 years before 2010         | 63878 | 9.47     | 103641 | 8.65     |
| Number of months unemployed: 2-4 years before 2010       | 63878 | 25.34    | 103641 | 21.37    |
| Number of months unemployed: 5-7 years before 2010       | 63878 | 14.93    | 103641 | 11.88    |
| Number of months seeking work: 1 years before 2010       | 63878 | 0.83     | 103641 | 0.49     |
| Number of months seeking work: 2-4 years before 2010     | 63878 | 1.86     | 103641 | 1.20     |
| Number of months seeking work: 5-7 years before 2010     | 63878 | 1.28     | 103641 | 0.92     |
| Number of months program: 1 years before 2010            | 63878 | 0.53     | 103641 | 0.66     |
| Number of months program: 2-4 years before 2010          | 63878 | 1.87     | 103641 | 2.28     |
| Number of months program: 5-7 years before 2010          | 63878 | 6.80     | 103641 | 4.76     |
| Employed at all in the last 7 years before 2010          | 63878 | 0.44     | 103641 | 0.45     |
| <b>Regional information</b>                              |       |          |        |          |
| Regional unemployment rate (level of job centres)        | 62722 | 10.05    | 102493 | 9.86     |
| Regional employment rate (level of job centres)          | 62722 | 50.32    | 102493 | 49.53    |
| GDP per capita of employed person (level of job centres) | 63149 | 54149.53 | 101594 | 59327.68 |

**Table A.1.** Summary of descriptive statistics for participants and non-participants. *Source:* own calculations

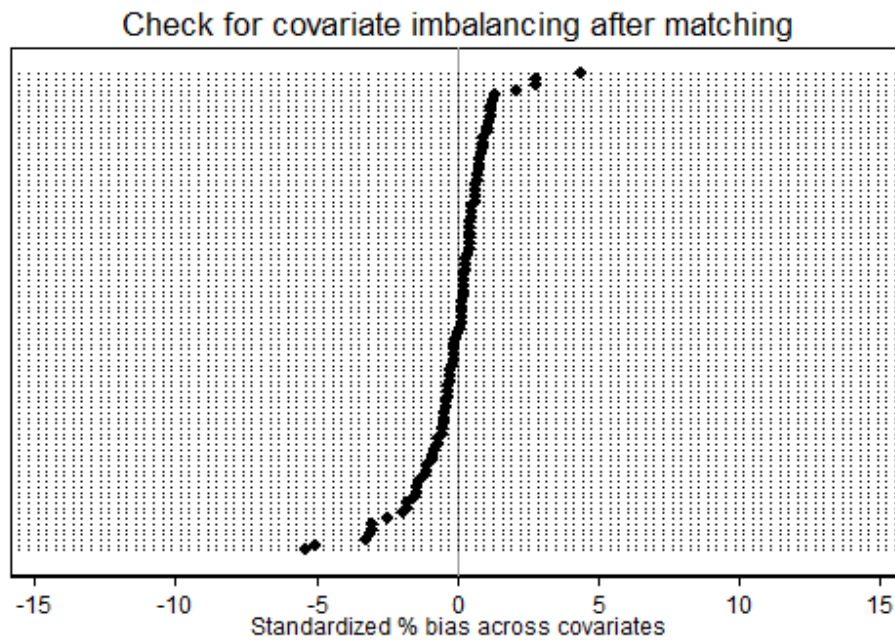

**Graph A.1.** Standardized bias of the radius-matching estimation, 180 days after programme start. *Source:* own calculations, based on IEB.

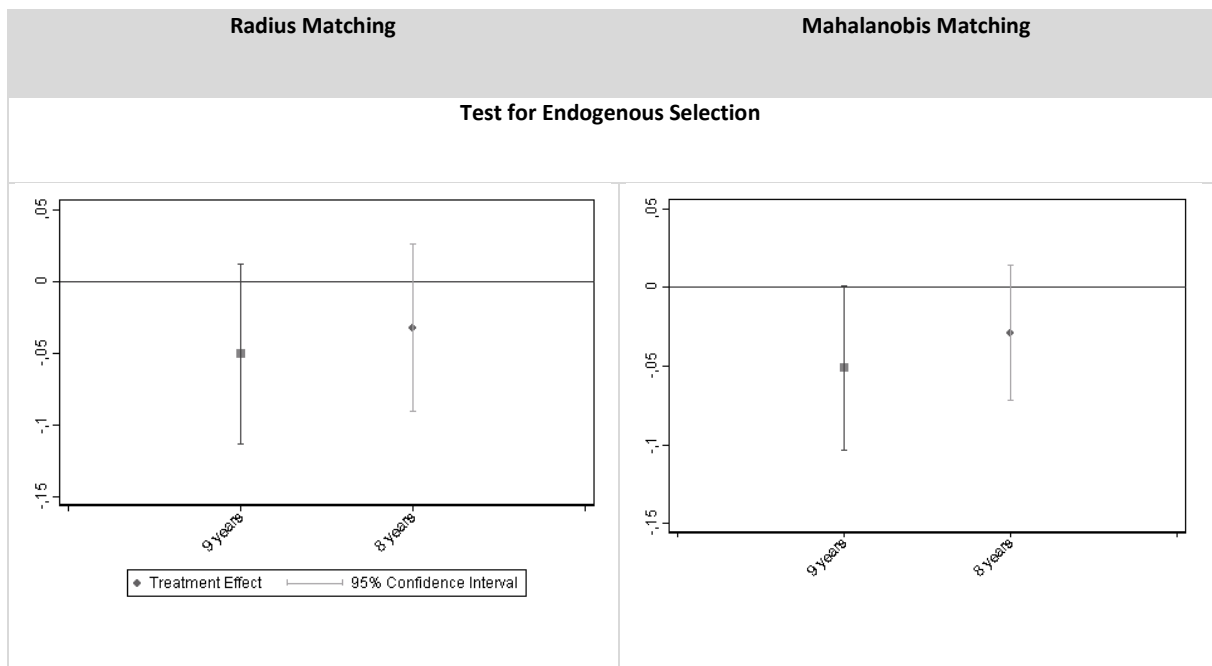

**Graph A.2.** Estimated (pseudo-) treatment effects based radius-matching (left) and mahalanobis-matching (right) with regression adjustment. *Source:* own calculations based on IEB.

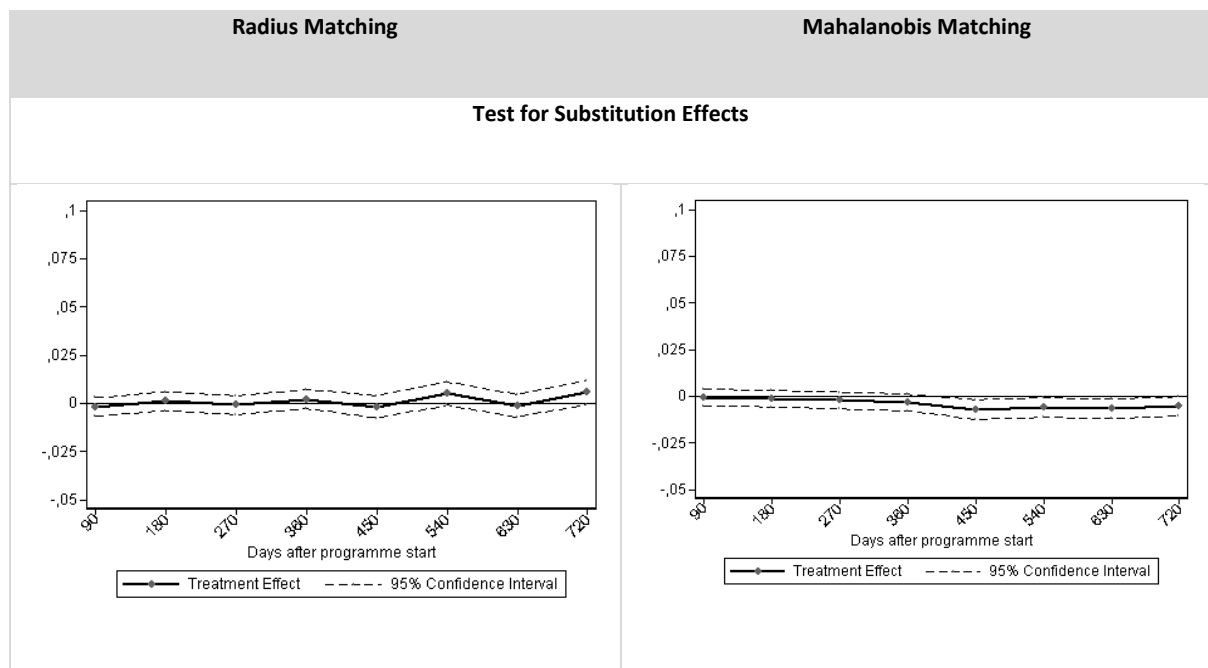

**Graph A.3.** Estimated substitution effects based on semi-parametric difference-in-differences estimation with radius-matching (left) and mahalanobis-matching (right). *Source:* own calculations based on IEB. The points in time refer to the definition of the point  $t_1$ ,  $t_0$  is the point in time one year ago.
